# Supplementary material for: Brain-wide pleiotropy investigation of alcohol drinking and tobacco smoking behaviors
Source: medRxiv preprint, doi:10.1101/2024.05.27.24307989, version 1 (2024-05-28)
Supplement: Supplemental Figures [file 307989_file06.docx]

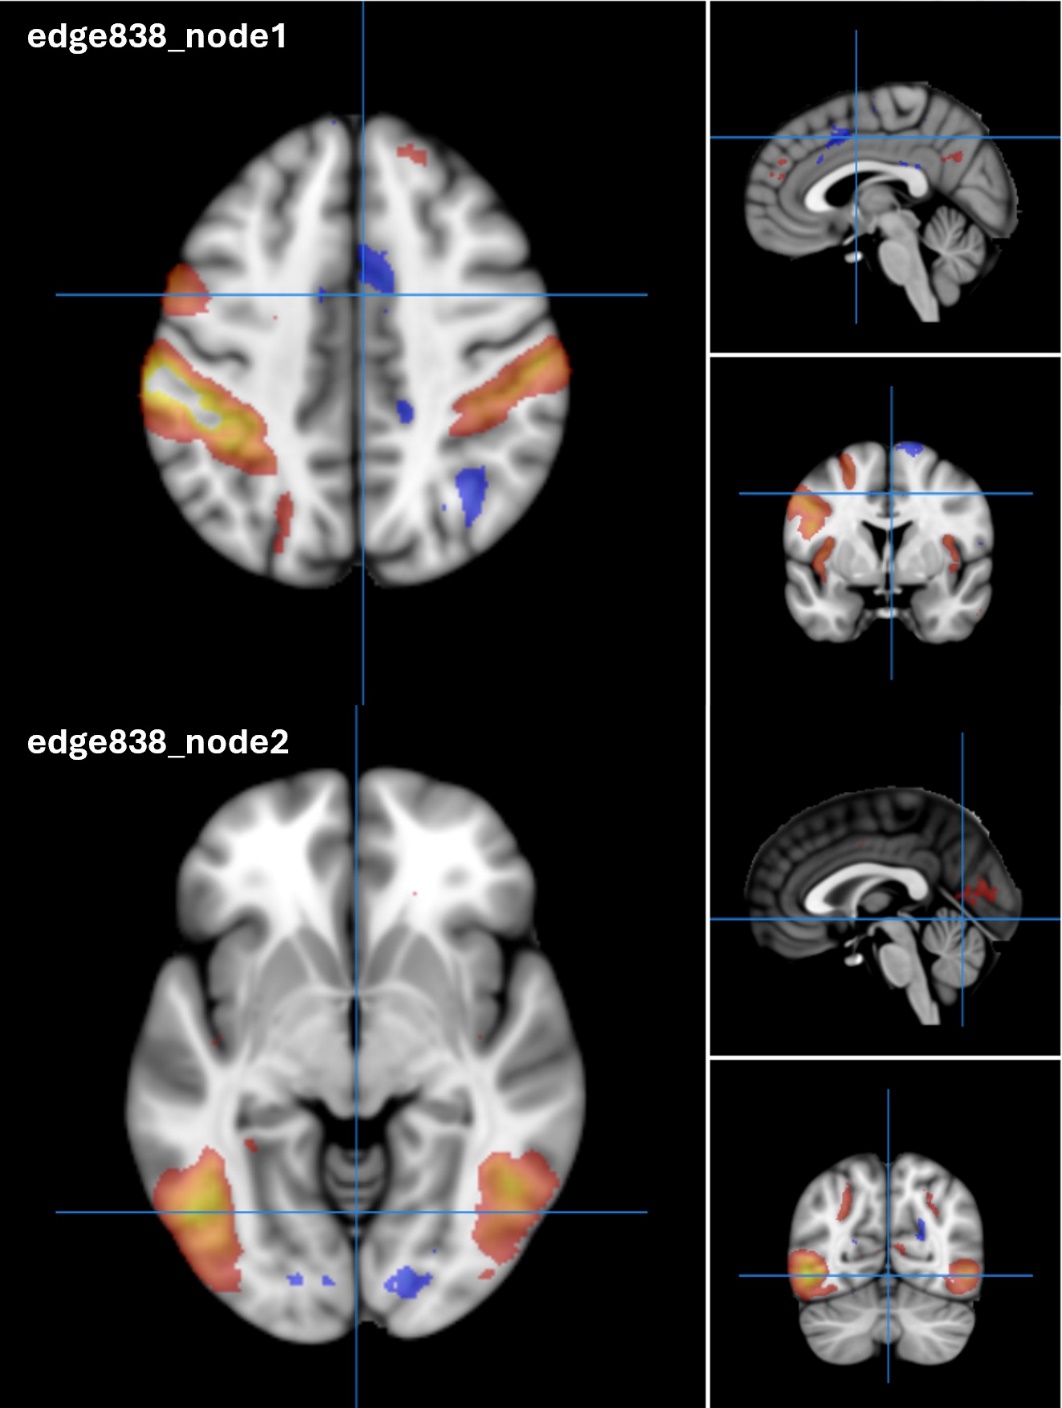


**Supplemental Fig. 1**: Brain imaging-derived phenotypes (IDP) 3266 reflecting edge 838 of dimensionality 100 separated by spatial Independent Component Analysis (ICA) in resting-state functional magnetic resonance imaging.


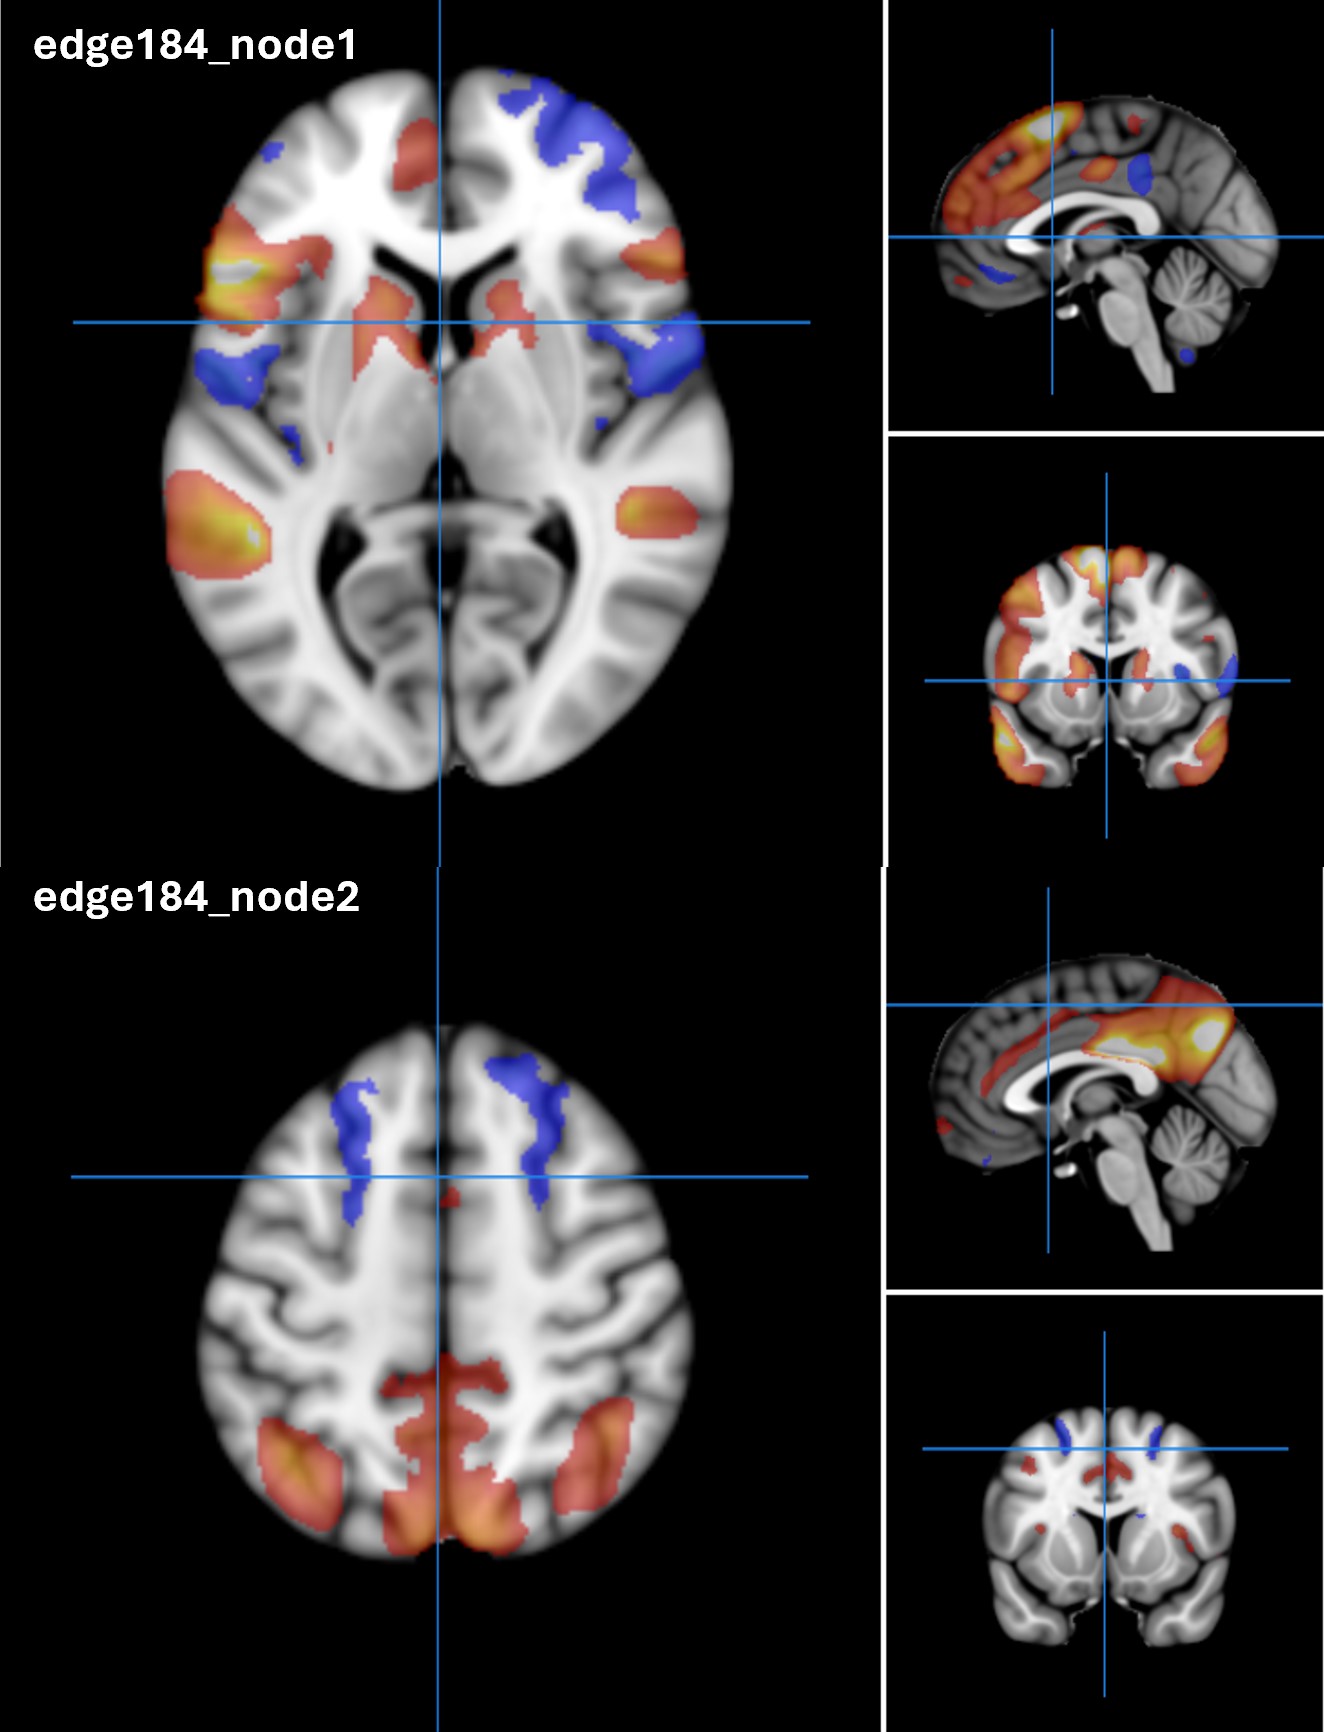


**Supplemental Fig. 2**: IDP 2402 reflecting edge 184 of dimensionality 25 separated by spatial ICA in resting-state functional magnetic resonance imaging.


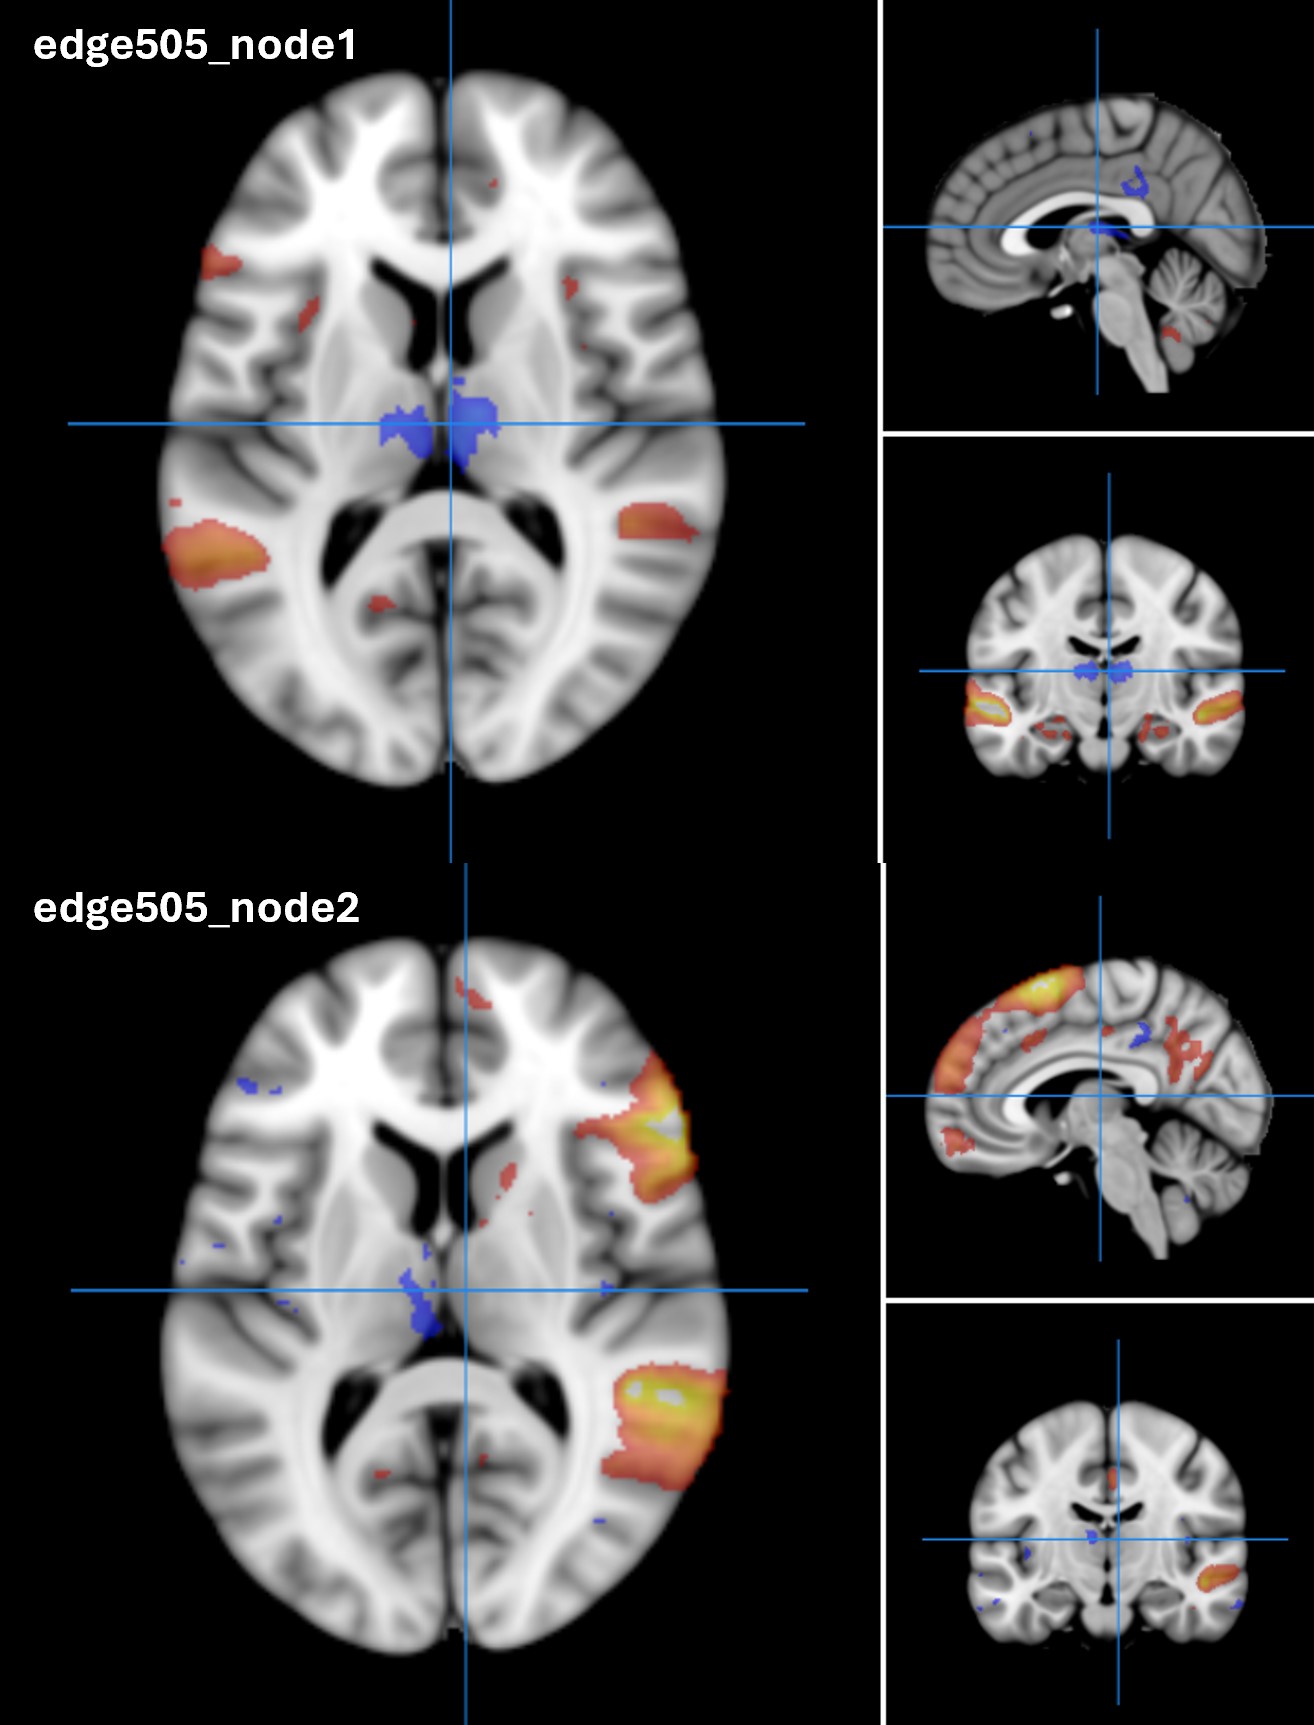


**Supplemental Fig. 3**: IDP 2933 reflecting edge 505 of dimensionality 100 separated by spatial ICA in resting-state functional magnetic resonance imaging.
